# Supplementary material for: Associations of Single-Nucleotide Polymorphisms in Slovenian Patients with Acute Central Serous Chorioretinopathy
Source: MDPI journal article supplement (doi:10.3390/genes13010055), 2021-12-25
Supplement: s1 [file s1]

## Supplement

**Table S1.** Oligonucleotide primer sequences for the High Resolution Melt (HRM) analysis

| SNP                     | Primer sequence |                              | Length (bp) |
|-------------------------|-----------------|------------------------------|-------------|
| NR3C2<br>rs5522         | Forward:        | TTCAGAGGGCTGCAAACA           | 124         |
|                         | Reverse:        | ACACGCCCTTGAGATCATTTA        |             |
| CFH<br>rs1329428        | Forward:        | AGTGGTCTAGATAGACTCTGGAT      | 112         |
|                         | Reverse:        | CACAAACTTGAGTGCCCTAAC        |             |
| CFH<br>rs3753394        | Forward:        | ACAATAGACCCGAATAGAGTTTGA     | 119         |
|                         | Reverse:        | CTAGGGAAATTCTCCGTTGGAA       |             |
| CFH<br>rs1065489        | Forward:        | TGATGTCATAGTAGCTCCTGTATTG    | 200         |
|                         | Reverse:        | ACTTCTTCTCCATACTGATAACTGTC   |             |
| CDH5<br>rs7499886       | Forward:        | AGCTGCTCTTATGTGAAATACCT      | 121         |
|                         | Reverse:        | ATCATGAGCCTCTGCATCTTC        |             |
| CFH<br>rs800292         | Forward:        | AGGCACCCAGGCTATCTATAA        | 97          |
|                         | Reverse:        | TGGATTAAGAGCAACCCATTCT       |             |
| ARMS2<br>rs10490924     | Forward:        | GACAAGCAGAGGAGCAAACCT        | 93          |
|                         | Reverse:        | AGGAGAGAAGAAGGCTGGTAA        |             |
| TNFRSF10A<br>rs13278062 | Forward:        | CGGAATGAAGGACACAGAGG         | 135         |
|                         | Reverse:        | CAGAGCTTGACTCCATCTCAA        |             |
| CFH<br>rs1061170        | Forward:        | CCTTTGTTAGTAACTTTAGTTCGTCTTC | 250         |
|                         | Reverse:        | GATGGCAGGCAACGTCTAT          |             |
| COL4A3<br>rs10178458    | Forward:        | AATAATAAGAACTTTGTATGT        | 106         |
|                         | Reverse:        | GGGAATTAGGCATGCAAA           |             |
| COL4A3<br>rs55703767    | Forward:        | GACCCATTTCTTTTGTCT           | 110         |
|                         | Reverse:        | AAAATAGGCTATTAGGGAGA         |             |
| COL4A4<br>rs2229814     | Forward:        | TATAGAAGACAGTCAGAAAA         | 181         |
|                         | Reverse:        | TAGAAATTCTACCTTTGGTG         |             |
| COL4A4<br>rs2229813     | Forward:        | AAAGAACTTATTAAGCCTT          | 153         |
|                         | Reverse:        | TTGTTATTTTATGCTGTTA          |             |

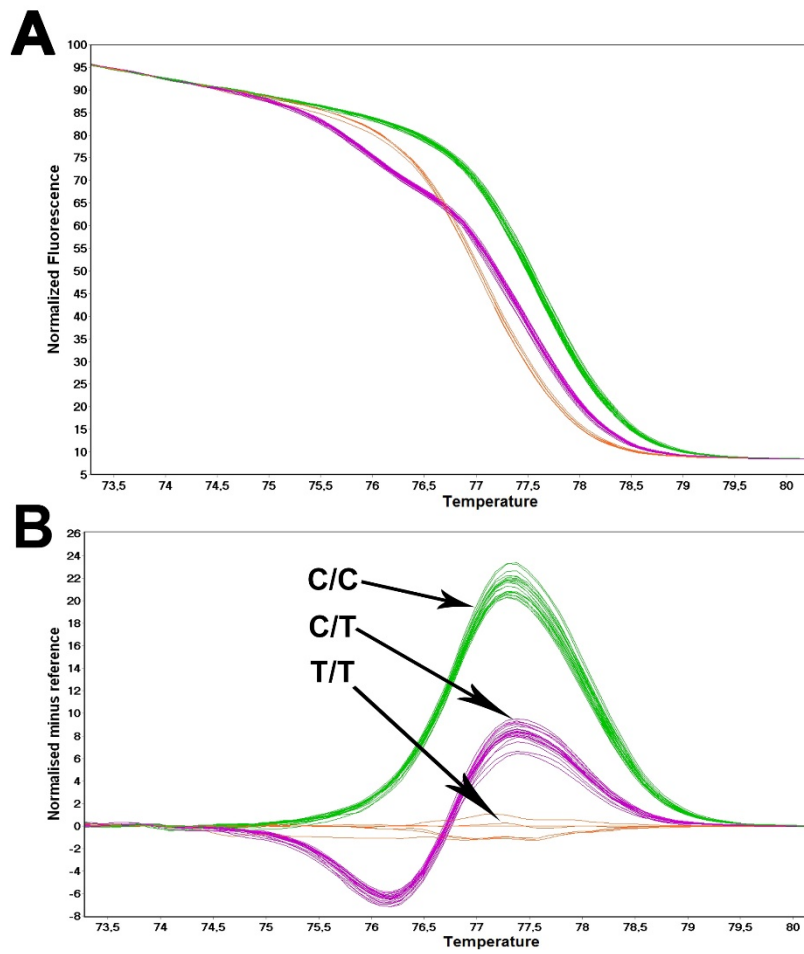

**Figure S1.** Example of the High Resolution Melt (HRM) analysis with distinct genotypes of CFH-rs1329428. Normalized high-resolution melting profile (A) together with differential plot (B).
